# Supplementary material for: Spectral imaging and a one-class classifier for detecting elastane in cotton fabrics
Source: Royal Society of Chemistry journal article supplement (doi:10.1039/d5an00107b), 2025-01-01
Supplement: d5an00107b1.pdf [file d5an00107b1.pdf]

Supplementary material

## **Spectral imaging and a one-class classifier for detecting elastane in cotton fabrics**

Ella Mahlamäki<sup>1\*</sup>, Inge Schlapp-Hackl<sup>2</sup>, Tharindu Koralage<sup>2</sup>, Michael Hummel<sup>2</sup>, Mikko Mäkelä<sup>1</sup>

<sup>1</sup> VTT Technical Research Centre of Finland Ltd., PO Box 1000, 02044 VTT Espoo, Finland

<sup>2</sup> Aalto University, School of Chemical Engineering, Department of Bioproducts and Biosystems, PO Box  
16300, 00076 Aalto, Finland

E-mail: [ella.mahlamaki@vtt.fi](mailto:ella.mahlamaki@vtt.fi) (E. Mahlamäki)

## Supplementary material

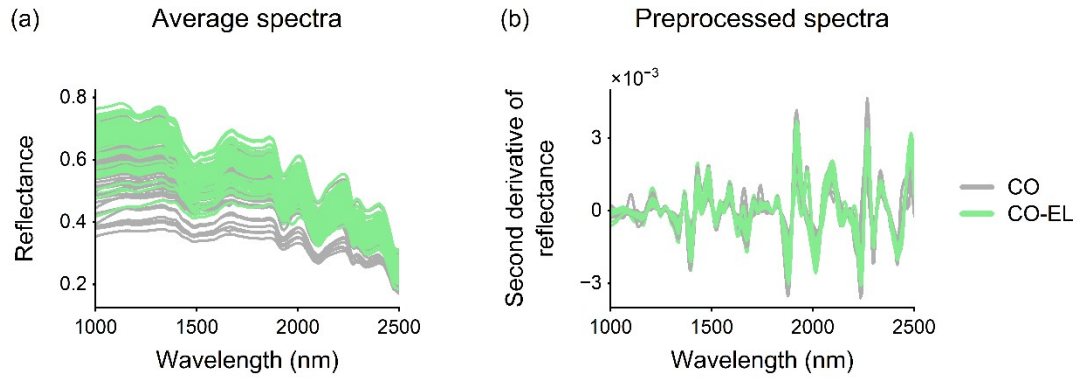

**Figure S1:** Average sample spectra (a), and preprocessed average sample spectra (b). Spectra have been colored based on the sample classes.

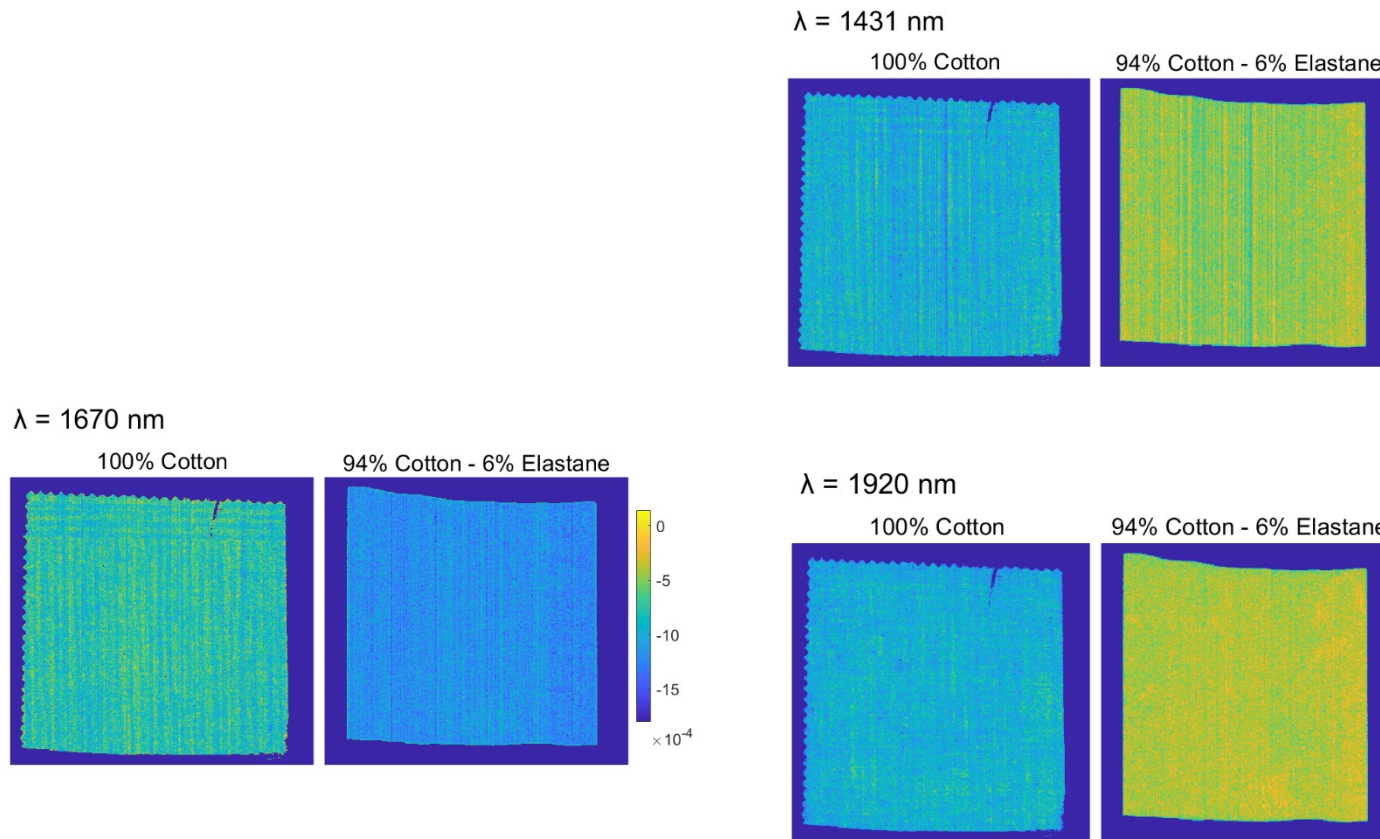

**Figure S2:** Preprocessed NIR images at the wavelengths separating samples in cotton and cotton-elastane classes. Wavelengths chosen in the figures are discussed in text.

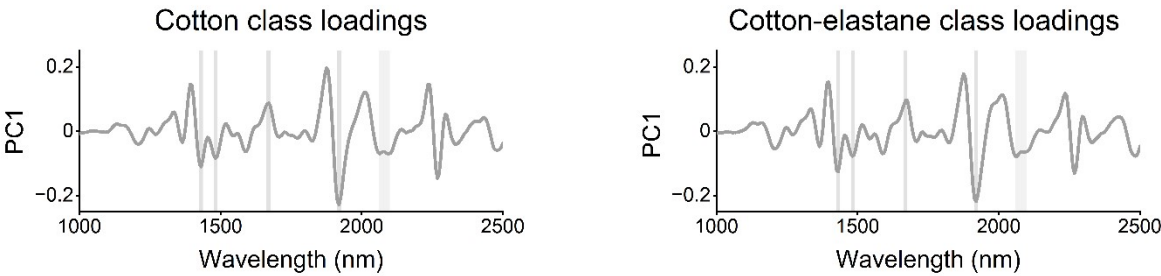

**Figure S3:** Disjoint PCA loading plots for both cotton and cotton-elastane classes. Important wavelengths marked in the figures and discussed in text.

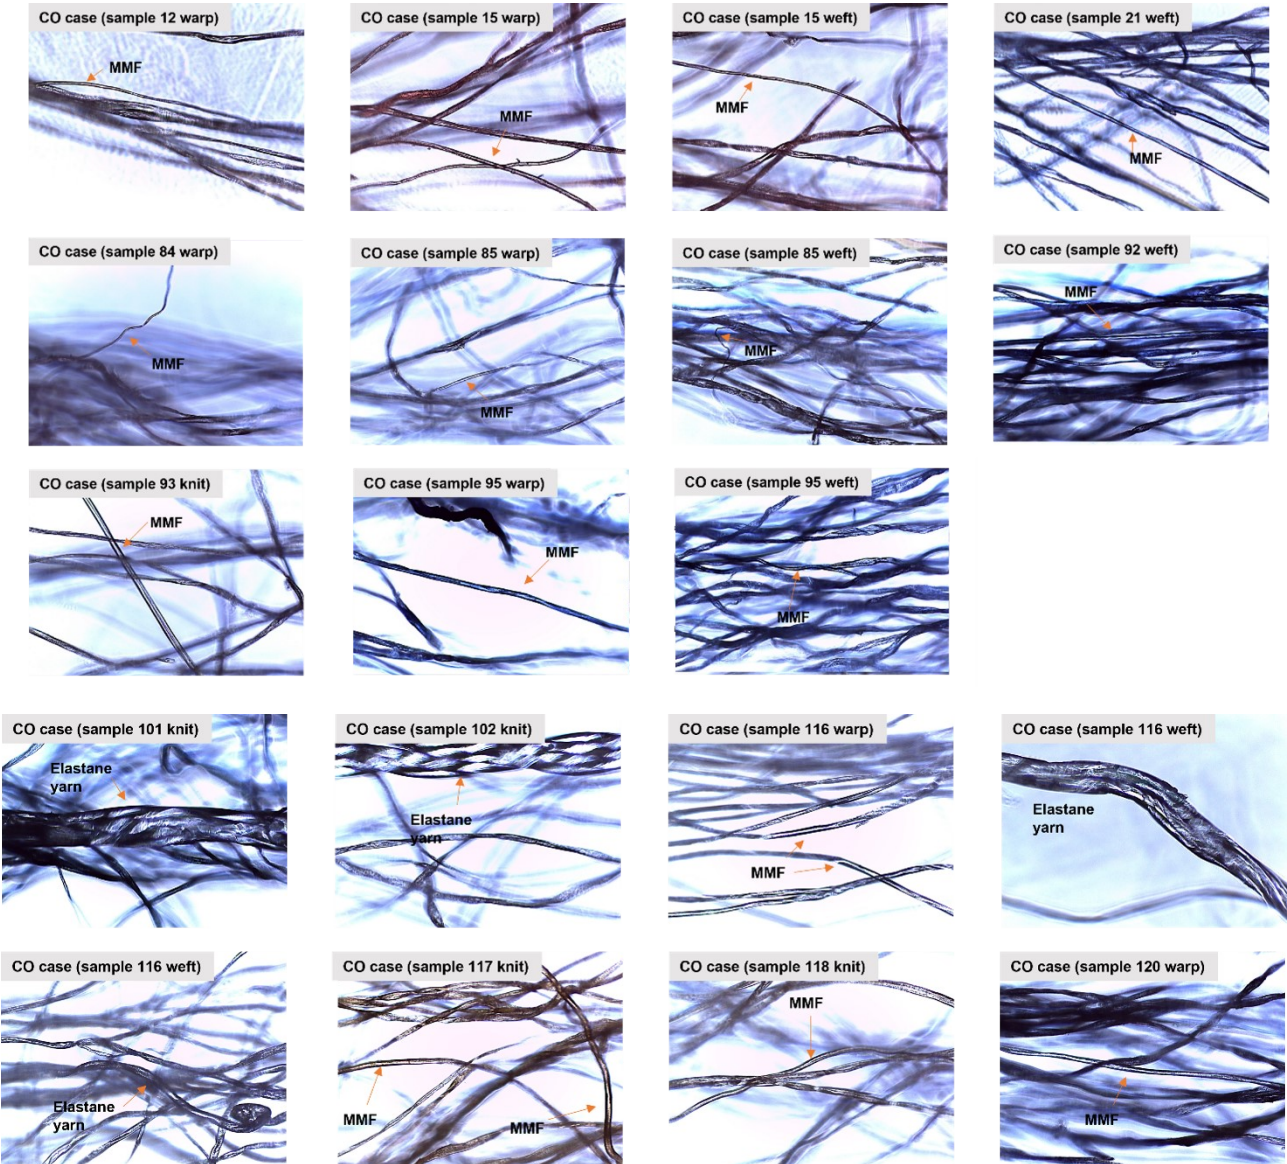



Supplementary material

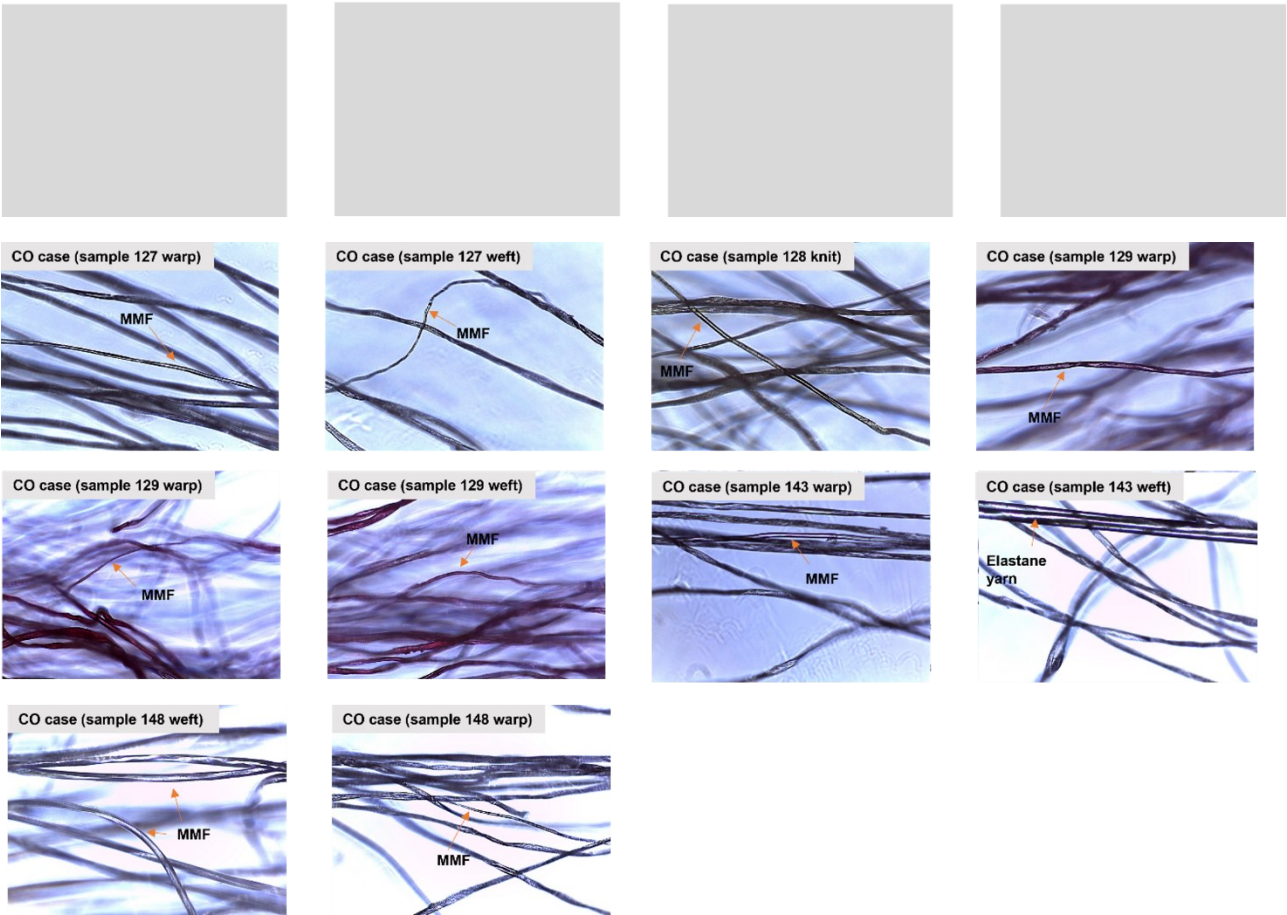

**Figure S4:** Microscopic structural images of the cotton (CO) outliers. Elastane and extraneous synthetic man-made fibers (MMF) present marked in the figure.

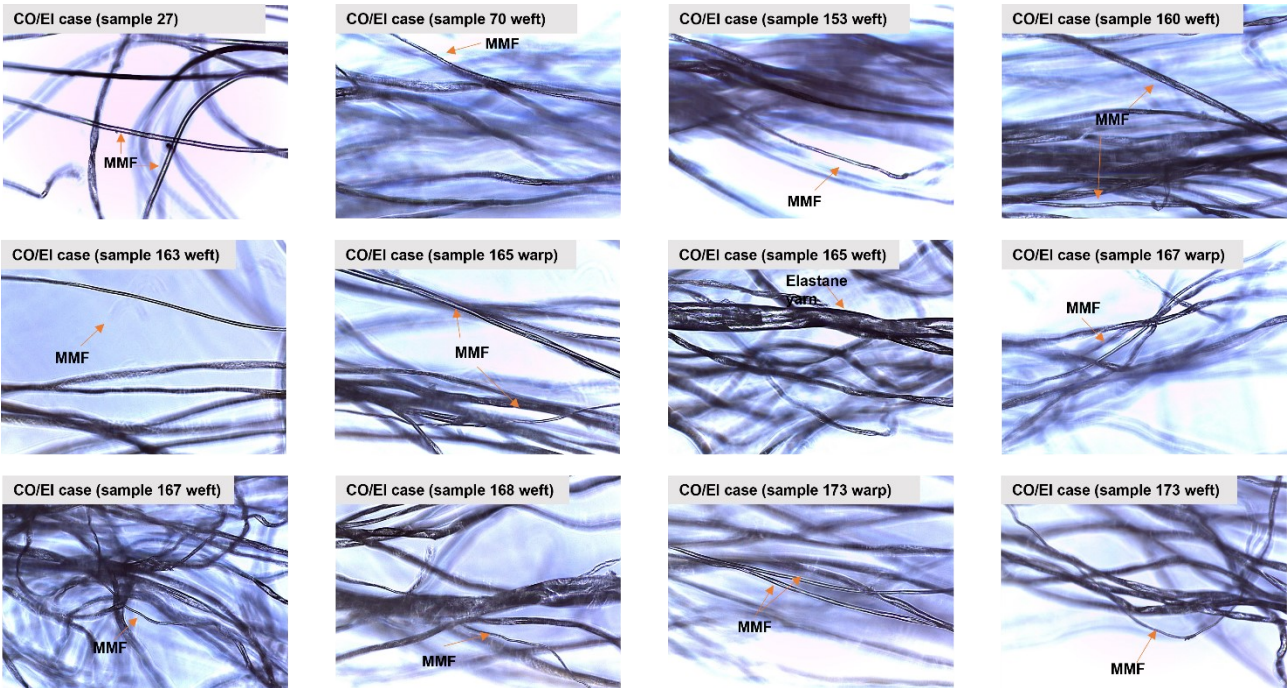



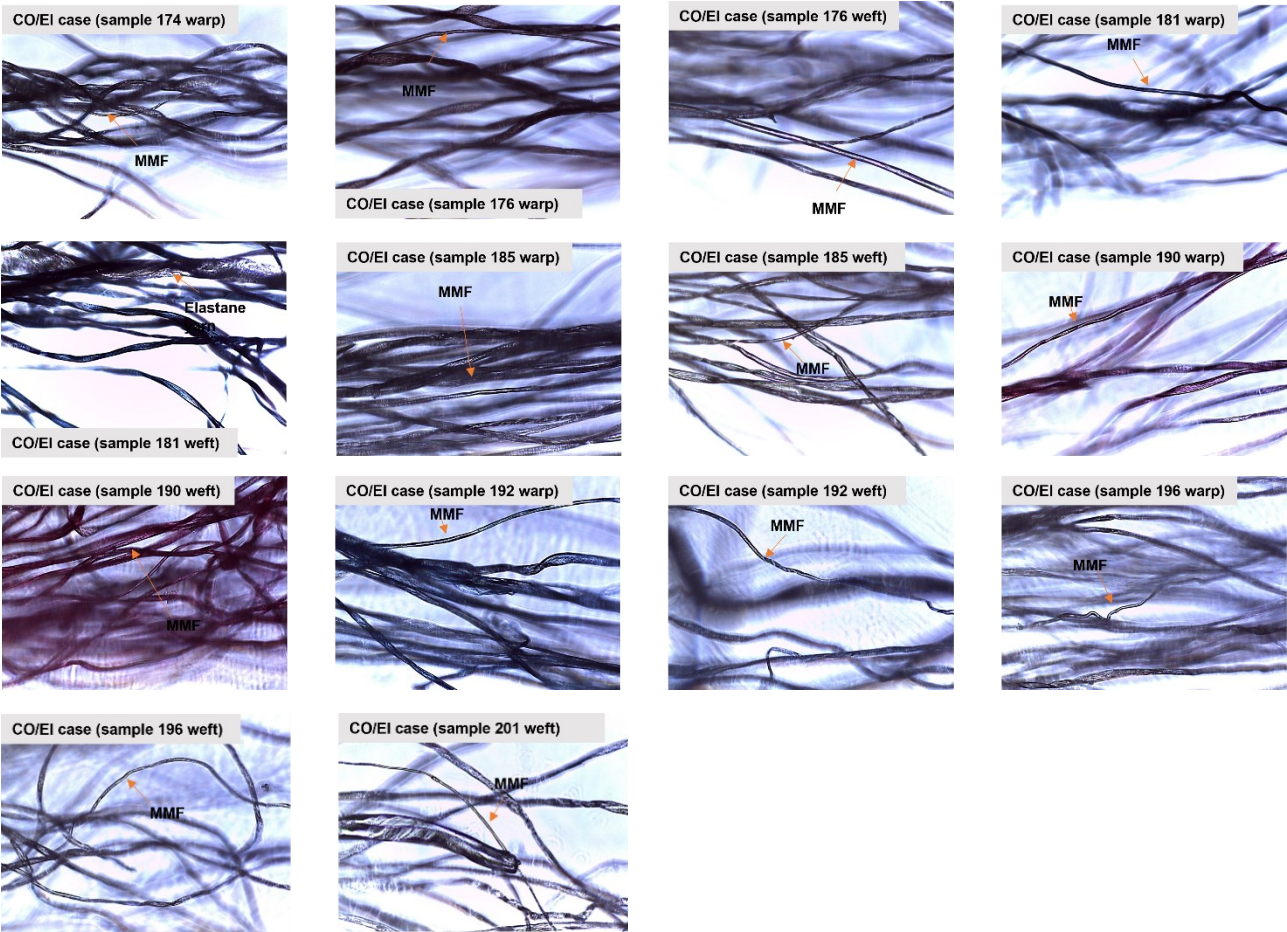

**Figure S5:** Microscopic structural images of the cotton-elastane (CO/EI) outliers. Elastane and extraneous synthetic man-made fibers (MMF) present marked in the figure.

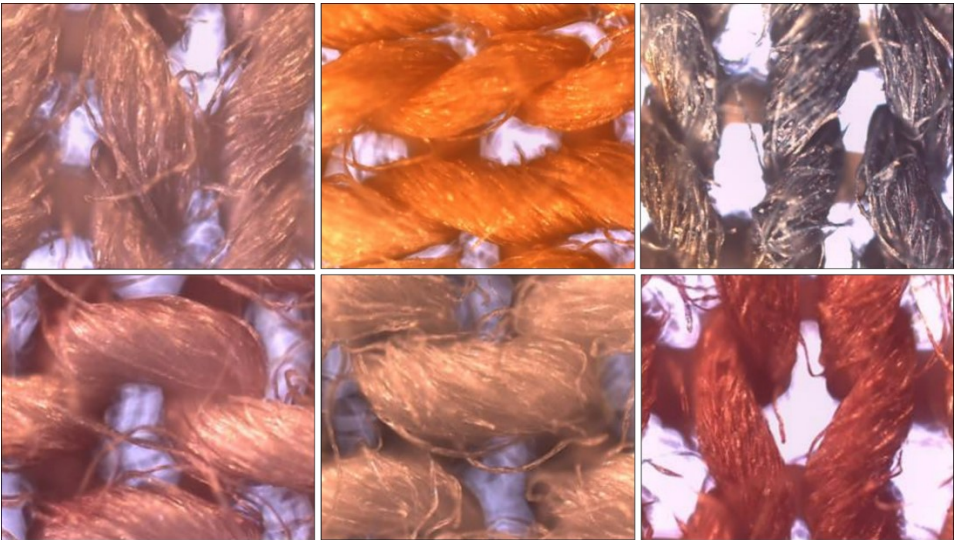

**Figure S6:** Illustration of the knitted structure of some cotton-elastane (CO/EI) outliers.

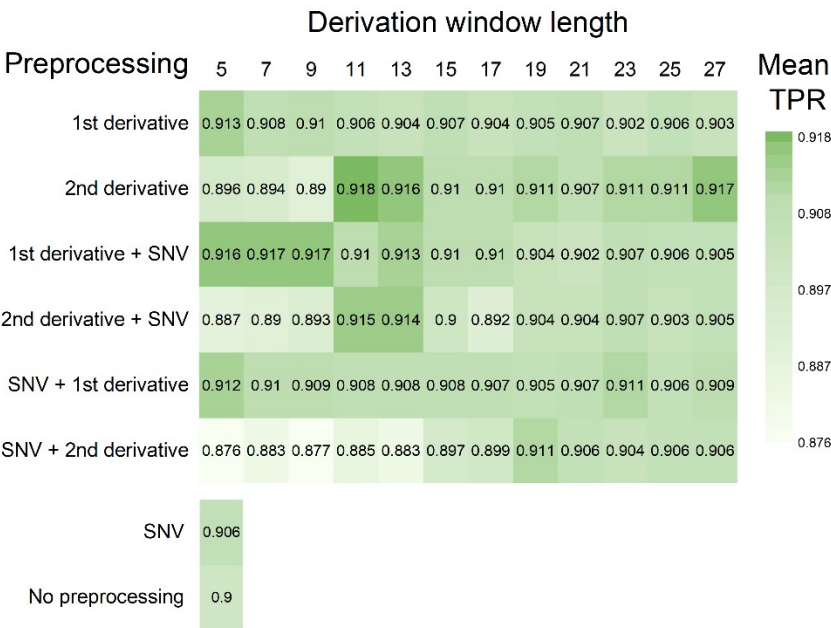

**Figure S7:** Monte Carlo cross-validation mean true positive rate (TPR) for each preprocessing combination and derivation window length for methods that include derivation.

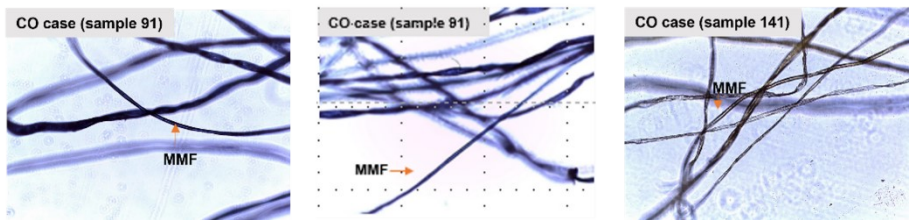

**Figure S8:** Microscopic structural images of misclassified CO fabrics. Synthetic man-made fibers (MMF) present marked in the figure.
